# Supplementary material for: Alterations in Plasma Lipidomic Profiles in Adult Patients with Schizophrenia and Major Depressive Disorder
Source: MDPI journal article supplement (doi:10.3390/medicina58111509), 2022-10-24
Supplement: s1 [file s1]

**Supplementary Table S2. Correlation between clinical symptoms and levels of lipid classes in the plasma**

| Lipid   | HAMA    |                | HAMD    |                | Positive score |                | Negative score |                | General score |                |
|---------|---------|----------------|---------|----------------|----------------|----------------|----------------|----------------|---------------|----------------|
|         | r value | <i>P</i> value | r value | <i>P</i> value | r value        | <i>P</i> value | r value        | <i>P</i> value | r value       | <i>P</i> value |
| OAHFA   | -0.133  | 0.283          | -0.089  | 0.473          | 0.084          | 0.513          | 0.188          | 0.140          | 0.101         | 0.432          |
| WE      | -0.067  | 0.592          | 0.021   | 0.866          | 0.144          | 0.259          | 0.018          | 0.890          | 0.055         | 0.668          |
| AcCa    | -0.606  | 0.000          | -0.578  | 0.000          | -0.374         | 0.003          | -0.424         | 0.001          | -0.518        | 0.000          |
| DG      | 0.074   | 0.551          | 0.082   | 0.511          | 0.140          | 0.272          | 0.223          | 0.078          | 0.157         | 0.220          |
| TG      | 0.199   | 0.106          | 0.102   | 0.412          | 0.009          | 0.945          | 0.120          | 0.349          | 0.078         | 0.545          |
| MG      | 0.141   | 0.255          | 0.159   | 0.199          | -0.075         | 0.561          | 0.127          | 0.323          | 0.003         | 0.984          |
| PC      | -0.036  | 0.771          | -0.060  | 0.630          | -0.067         | 0.602          | -0.061         | 0.632          | 0.025         | 0.844          |
| PI      | 0.159   | 0.199          | 0.168   | 0.173          | 0.030          | 0.816          | 0.016          | 0.899          | 0.108         | 0.401          |
| PE      | -0.210  | 0.087          | -0.202  | 0.102          | -0.273         | 0.031          | -0.280         | 0.026          | -0.210        | 0.099          |
| PS      | -0.425  | 0.000          | -0.436  | 0.000          | -0.538         | 0.000          | -0.532         | 0.000          | -0.478        | 0.000          |
| PG      | -0.166  | 0.180          | -0.120  | 0.334          | 0.157          | 0.218          | 0.082          | 0.525          | 0.161         | 0.208          |
| LPC     | 0.164   | 0.185          | 0.026   | 0.832          | 0.293          | 0.020          | 0.370          | 0.003          | 0.352         | 0.005          |
| CL      | -0.132  | 0.287          | -0.058  | 0.641          | -0.117         | 0.359          | -0.185         | 0.147          | -0.170        | 0.182          |
| LPE     | 0.068   | 0.586          | -0.071  | 0.570          | 0.343          | 0.006          | 0.414          | 0.001          | 0.347         | 0.005          |
| LPI     | -0.130  | 0.293          | -0.124  | 0.318          | 0.187          | 0.141          | 0.208          | 0.102          | 0.281         | 0.026          |
| PA      | 0.190   | 0.123          | 0.167   | 0.176          | 0.156          | 0.223          | 0.105          | 0.413          | 0.233         | 0.066          |
| PIP     | 0.338   | 0.005          | 0.331   | 0.006          | 0.407          | 0.001          | 0.345          | 0.006          | 0.447         | 0.000          |
| PIP2    | 0.232   | 0.058          | 0.243   | 0.047          | 0.297          | 0.018          | 0.172          | 0.179          | 0.263         | 0.037          |
| ChE     | 0.104   | 0.404          | 0.016   | 0.898          | 0.039          | 0.764          | 0.000          | 0.998          | 0.093         | 0.469          |
| DGDG    | 0.006   | 0.963          | 0.077   | 0.536          | 0.291          | 0.021          | 0.242          | 0.056          | 0.210         | 0.099          |
| MGDG    | -0.165  | 0.182          | -0.210  | 0.089          | -0.337         | 0.007          | -0.325         | 0.009          | -0.225        | 0.076          |
| Co(Q10) | -0.172  | 0.165          | -0.133  | 0.285          | -0.050         | 0.699          | -0.033         | 0.795          | -0.039        | 0.764          |
| SM      | -0.096  | 0.441          | -0.095  | 0.443          | -0.154         | 0.227          | -0.069         | 0.591          | -0.073        | 0.569          |
| ST      | -0.204  | 0.097          | -0.147  | 0.234          | -0.226         | 0.075          | -0.236         | 0.063          | -0.165        | 0.197          |
| Cer     | -0.152  | 0.218          | -0.212  | 0.085          | 0.203          | 0.111          | 0.284          | 0.024          | 0.186         | 0.144          |
| CerG    | -0.193  | 0.118          | -0.219  | 0.074          | -0.138         | 0.282          | -0.156         | 0.223          | -0.193        | 0.130          |
| GM3     | 0.296   | 0.015          | 0.325   | 0.007          | 0.067          | 0.603          | 0.193          | 0.130          | 0.147         | 0.250          |
| phSM    | -0.042  | 0.739          | -0.151  | 0.222          | -0.160         | 0.210          | -0.094         | 0.464          | -0.173        | 0.174          |
| CerP    | 0.187   | 0.129          | 0.108   | 0.383          | 0.042          | 0.744          | 0.073          | 0.569          | 0.147         | 0.252          |
| GD2     | 0.194   | 0.116          | 0.205   | 0.096          | -0.113         | 0.378          | -0.090         | 0.485          | -0.013        | 0.917          |
