# Supplementary material for: Alterations in Plasma Lipidomic Profiles in Adult Patients with Schizophrenia and Major Depressive Disorder
Source: MDPI journal article supplement (doi:10.3390/medicina58111509), 2022-10-24
Supplement: s1 [file s1]

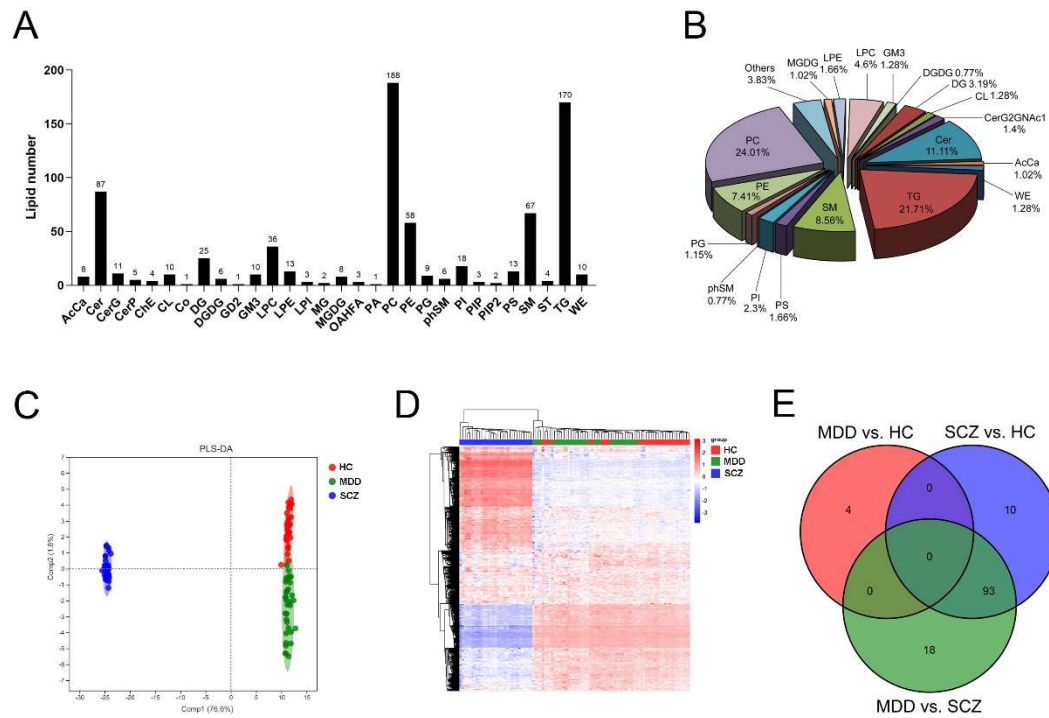

**Figure S1.** (A) Number of identified lipid subgroups and lipid molecules in this experiment and (B) percentage composition of lipid content in each lipid class. (C) Scatter plot of OPLS-DA model for three groups, (D) heatmap analysis for lipid composition in three groups, and (E) coverage of lipids in all three comparisons
