# Supplementary material for: Alterations in Plasma Lipidomic Profiles in Adult Patients with Schizophrenia and Major Depressive Disorder
Source: Medicina (Kaunas). 2022 Oct 24;58(11):1509. doi: 10.3390/medicina58111509 (PMC9697358; doi:10.3390/medicina58111509)
Supplement: Supplementary file 1 [file medicina-58-01509-s001.zip]

Archive with 5 entries (5 files):
- Supplementary Figures S1 and S2.pdf
- Supplementary Table S1-Clinical data(8-15).xls
- Supplementary Table S2 - Correlation.pdf
- Supplementary Table S3-Differential lipid between each group.xlsx
- Supplementary Table S4. Correlation between clinical symptoms and levels of differential lipids in the plasma.xlsx
