# Supplementary material for: Alterations in Plasma Lipidomic Profiles in Adult Patients with Schizophrenia and Major Depressive Disorder
Source: Medicina (Kaunas). 2022 Oct 24;58(11):1509. doi: 10.3390/medicina58111509 (PMC9697358; doi:10.3390/medicina58111509)
Supplement: Supplementary file 1 [file medicina-58-01509-s001.zip › Supplementary Table S1-Clinical data(8-15).xls]

## Sheet: Sheet2
Supplementary Table S1. Clinical information of enrolled individuals			Clinical information of enrolled individuals
ID	Age	Gender	Dwelling condition	Marital status	Education level	Sample center	BMI	Height (m)	Weight(kg)	Diagnosis	Staple food structure	Frequency of eating vegetables	Frequency of eating ivestock meat	Frequency of eating poultry	Frequency of eating nutrient supplements	Frequency of drinking yogurt or probiotic drinks	Smoking	In the past six months exposure to secondhand smoke situation	TG mmol/L	LDL mmol/L	HDL mmol/L	CHOL mmol/L	-	HAMA	HAMD	PANSS	Positive	Negative	General
HC-1	47	famale	famliy life	married	Undergraduate	Xi'an	16.9796	1.75	52	healthy	rice	often	occasionally	occasionally	occasionally	occasionally	never smoke or occasionally smoke	almost none	0.85	3.46	1.38	3.74	-	5	6	35	8	8	19
HC-2	31	famale	famliy life	married	graduate	Xi'an	17.9687	1.6	46	healthy	rice,flour	often	often	occasionally	often	occasionally	never smoke or occasionally smoke	almost none	0.52	1.74	0.71	4.44	-	2	5	34	7	8	19
HC-3	30	male	famliy life	married	Undergraduate	Xi'an	26.7299	1.73	80	healthy	rice,flour	often	often	occasionally	occasionally	occasionally	never smoke or occasionally smoke	almost none	0.74	1.22	1.41	4.02	-	5	1	30	7	7	16
HC-4	32	famale	famliy life	married	Undergraduate	Xi'an	19.052	1.62	50	healthy	rice	occasionally	often	often	occasionally	occasionally	never smoke or occasionally smoke	almost none	1.65	2.88	1.39	3.96	-	1	1	31	7	7	17
HC-5	31	famale	famliy life	married	graduate	Xi'an	20.7031	1.6	53	healthy	rice	often	occasionally	occasionally	often	often	never smoke or occasionally smoke	almost none	1.06	2.62	1.15	4.5	-	5	2	39	7	9	23
HC-6	26	male	group living	single	Undergraduate	Xi'an	24.093	1.68	68	healthy	rice,flour	often	twice or three times a week	twice or three times a week	twice or three times a week	twice or three times a week	never smoke or occasionally smoke	almost none	0.5	1.03	1.57	3.13	-	5	4	33	7	7	19
HC-7	26	male	famliy life	single	Undergraduate	Xi'an	26.7299	1.73	80	healthy	flour	often	often	often	often	occasionally	never smoke or occasionally smoke	almost none	1.28	2.23	1.31	3.82	-	7	3	31	7	7	17
HC-8	45	male	famliy life	married	Undergraduate	Xi'an	24.0569	1.73	72	healthy	rice	often	twice or three times a week	twice or three times a week	occasionally	occasionally	never smoke or occasionally smoke	almost none	0.7	1.09	1.05	2.48	-	2	3	37	9	9	19
HC-9	24	famale	famliy life	single	Undergraduate	Xi'an	18.8324	1.77	59	healthy	rice	often	twice or three times a week	twice or three times a week	often	often	never smoke or occasionally smoke	less than 1 hour a day	0.97	1.25	1.33	4.03	-	7	3	39	7	8	24
HC-10	24	famale	famliy life	single	Undergraduate	Xi'an	19.3337	1.64	52	healthy	rice	often	occasionally	often	occasionally	occasionally	never smoke or occasionally smoke	almost none	0.59	2.83	0.99	4.47	-	2	3	39	11	8	20
HC-11	53	famale	famliy life	married	Undergraduate	Xi'an	21.875	1.6	56	healthy	rice	often	occasionally	twice or three times a week	twice or three times a week	often	never smoke or occasionally smoke	less than 1 hour a day	0.64	2.06	0.88	3.07	-	3	1	42	11	7	24
HC-12	44	famale	famliy life	married	junior college	Xi'an	21.7738	1.66	60	healthy	rice	often	twice or three times a week	twice or three times a week	often	occasionally	never smoke or occasionally smoke	almost none	1.24	3.58	1.68	5.64	-	3	2	35	9	7	19
HC-13	35	famale	famliy life	married	Undergraduate	Xi'an	20.7031	1.6	53	healthy	rice,flour	often	occasionally	occasionally	often	occasionally	never smoke or occasionally smoke	2-4 hour a day	1.38	1.43	0.7	5.95	-	3	7	33	7	9	17
HC-14	29	famale	famliy life	married	junior college	Xi'an	19.4674	1.65	53	healthy	rice,flour	often	occasionally	occasionally	occasionally	occasionally	never smoke or occasionally smoke	less than 1 hour a day	0.80	2.42	1.86	5.13	-	6	6	34	7	8	19
HC-15	29	famale	famliy life	married	Undergraduate	Xi'an	19.3625	1.67	54	healthy	rice,flour	often	occasionally	occasionally	occasionally	often	never smoke or occasionally smoke	almost none	1.21	1.75	1.65	3.76	-	2	3	38	7	7	24
HC-16	25	famale	famliy life	single	Undergraduate	Xi'an	23.5883	1.66	65	healthy	rice	often	twice or three times a week	twice or three times a week	often	occasionally	never smoke or occasionally smoke	almost none	1.33	3.37	1.00	4.57	-	7	3	38	7	9	22
HC-17	26	famale	famliy life	single	junior college	Xi'an	17.7154	1.68	50	healthy	rice,flour	often	often	occasionally	often	often	never smoke or occasionally smoke	almost none	0.7	2.53	0.91	2.83	-	3	4	34	7	7	20
HC-18	36	famale	famliy life	single after divorced	junior college	Xi'an	21.3039	1.65	58	healthy	rice,flour	often	twice or three times a week	twice or three times a week	often	occasionally	never smoke or occasionally smoke	almost none	1.38	1.86	0.74	4.05	-	5	1	37	7	9	21
HC-19	29	famale	famliy life	married	junior college	Xi'an	20.9042	1.68	59	healthy	rice	often	occasionally	occasionally	occasionally	often	never smoke or occasionally smoke	less than 1 hour a day	0.9	2.94	1.20	4.18	-	6	2	32	8	7	17
HC-20	39	famale	famliy life	married	Undergraduate	Xi'an	17.4191	1.66	48	healthy	rice	often	often	often	often	often	never smoke or occasionally smoke	almost none	0.92	1.45	1.60	3.45	-	6	6	40	9	9	22
HC-21	25	male	famliy life	single	junior college	Xi'an	25.9095	1.69	74	healthy	rice	often	occasionallyly	occasionally	occasionally	often	never smoke or occasionally smoke	almost none	0.94	1.43	0.7	5.34	-	4	2	42	11	8	23
HC-22	26	famale	famliy life	single	junior college	Xi'an	17.7734	1.6	45.5	healthy	rice	often	twice or three times a week	twice or three times a week	often	often	never smoke or occasionally smoke	almost none	0.70	1.09	1.05	3.81	-	1	6	36	8	8	20
HC-23	30	male	famliy life	married	Undergraduate	Xi'an	22.1367	1.66	61	healthy	flour	often	occasionally	occasionally	often	occasionally	intermittent smoking	less than 1 hour a day	0.84	2.33	1.52	4.32	-	7	3	39	9	8	22
HC-24	25	famale	famliy life	single	junior college	Xi'an	23.4509	1.74	71	healthy	flour	often	occasionally	twice or three times a week	often	occasionally	never smoke or occasionally smoke	almost none	2.00	1.19	1.85	4.27	-	3	5	41	7	12	22
HC-25	25	famale	group living	single	junior college	Xi'an	20.2848	1.57	50	healthy	rice,flour	often	occasionally	occasionally	often	often	never smoke or occasionally smoke	almost none	1.19	1.79	0.99	3.47	-	7	4	34	7	8	19
HC-26	25	famale	group living	married	junior college	Xi'an	19.1406	1.6	49	healthy	flour	often	occasionally	occasionally	occasionally	often	never smoke or occasionally smoke	almost none	0.74	2.47	1.94	5.13	-	4	5	30	7	7	16
HC-27	27	famale	famliy life	married	junior college	Xi'an	17.9687	1.6	46	healthy	rice,flour	often	occasionally	occasionally	often	occasionally	never smoke or occasionally smoke	less than 1 hour a day	1.28	2.43	1.01	5.12	-	7	5	31	7	7	17
HC-28	37	male	famliy life	married	Undergraduate	Xi'an	20.83	1.58	52	healthy	flour	often	occasionally	occasionally	often	occasionally	never smoke or occasionally smoke	almost none	0.76	2.82	2.03	4.39	-	7	3	33	9	7	17
HC-29	22	famale	group living	single	junior college	Xi'an	17.6745	1.78	56	healthy	rice	often	occasionally	occasionally	often	occasionally	never smoke or occasionally smoke	almost none	0.45	2.27	0.84	3.68	-	2	3	37	8	8	21
HC-30	23	male	group living	single	Undergraduate	Xi'an	20.1362	1.63	53.5	healthy	rice,flour	often	occasionally	occasionally	often	occasionally	intermittent smoking	almost none	0.45	2.06	1.21	3.9	-	4	2	39	9	9	21
HC-31	42	male	famliy life	married	junior college	Xi'an	24.4898	1.75	75	healthy	flour	often	often	often	often	occasionally	intermittent smoking	less than 1 hour a day	1.54	5.19	1.21	5.79	-	2	3	32	7	7	18
HC-32	49	male	famliy life	married	primary school	Xi'an	24.6548	1.56	60	healthy	rice,flour	often	occasionally	occasionally	occasionally	occasionally	never smoke or occasionally smoke	almost none	1.02	1.77	1.02	3.56	-	7	4	40	7	9	24
ID	Age	Gender	Dwelling condition	Marital status	Education level	Sample center	BMI	Height (m)	Weight(kg)	Diagnosis	Staple food structure	Frequency of eating vegetables	Frequency of eating ivestock meat	Frequency of eating poultry	Frequency of eating nutrient supplements	Frequency of drinking yogurt or probiotic drinks	Smoking	In the past six months exposure to secondhand smoke situation	TG mmol/L	LDL mmol/L	HDL mmol/L	CHOL mmol/L	Drugs	HAMA	HAMD	PANSS	Positive	Negative	General
S1	22	male	group living	single	high school	Xi'an	20.2865	1.79	65	schizophrenia	flour	often	occasionally	occasionally	occasionally	occasionally	never smoke or occasionally smoke	almost none	0.69	1.95	1.13	2.77	Risperidone 2mg/d	4	5	76	20	15	41
S2	32	famale	famliy life	married	Undergraduate	Xi'an	27.2173	1.66	75	schizophrenia	rice,flour	often	twice or three times a week	occasionally	occasionally	occasionally	never smoke or occasionally smoke	almost none	2.02	2.62	0.95	3.04	Risperidone 4mg/d	11	13	70	16	20	34
S3	22	famale	group living	single	high school	Xi'an	24.1415	1.55	58	schizophrenia	flour	often	occasionally	occasionally	often	occasionally	never smoke or occasionally smoke	almost none	1.51	2.68	1.17	3.41	Risperidone 2mg/d	12	9	121	25	29	67
S4	38	famale	famliy life	single	graduate	Xi'an	22.4913	1.7	65	schizophrenia	rice,flour	often	often	occasionally	occasionally	occasionally	never smoke or occasionally smoke	almost none	0.59	2.26	1.32	3.34	Amisulpride 0.2g/d	8	8	88	26	17	45
S5	39	famale	group living	single	junior high school	Xi'an	15.8725	1.81	52	schizophrenia	rice,flour	often	often	often	occasionally	often	never smoke or occasionally smoke	almost none	0.35	1.86	1.56	3.03	Risperidone 2mg/d	4	9	73	23	11	39
S6	28	famale	famliy life	single	high school	Xi'an	22.4913	1.7	65	schizophrenia	flour	often	often	twice or three times a week	occasionally	occasionally	intermittent smoking	almost none	0.74	3.01	1.30	3.84	Risperidone 1mg/d	11	14	70	17	16	37
S7	27	male	famliy life	single	junior high school	Xi'an	19.3625	1.67	54	schizophrenia	rice,flour	often	often	twice or three times a week	occasionally	often	intermittent smoking	1 to 2 hours a day	0.92	2.63	1.32	3.66	Paliperidone 6mg/d, Amisulpride 0.3g/d	3	6	78	24	12	42
S8	37	male	famliy life	single	junior high school	Xi'an	20.7612	1.7	60	schizophrenia	rice,flour	often	often	twice or three times a week	occasionally	often	intermittent smoking	1 to 2 hours a day	0.49	1.77	1.17	5.7	Paliperidone 9mg/d	2	3	64	17	12	35
S9	20	famale	group living	single	technical secongdary school	Xi'an	19.2894	1.61	50	schizophrenia	rice,flour	often	often	twice or three times a week	occasionally	occasionally	never smoke or occasionally smoke	almost none	0.68	2.33	1.31	3.35	Risperidone 2mg/d, Haloperidol injection 10mg	2	9	82	24	22	36
S10	33	famale	famliy life	married	primary school	Xi'an	24.4646	1.63	65	schizophrenia	rice,flour	often	twice or three times a week	twice or three times a week	occasionally	occasionally	never smoke or occasionally smoke	almost none	1.39	3.05	1.35	5.51	Quetiapine 0.2g, Sodium Valproat 0.5g	6	8	80	20	17	43
S11	21	male	famliy life	single	junior college	Xi'an	19.0773	1.86	66	schizophrenia	flour	often	often	occasionally	occasionally	occasionally	never smoke or occasionally smoke	almost none	0.41	1.73	1.32	3.88	Risperidone 2mg/d	9	12	95	25	20	50
S12	45	famale	famliy life	married	junior high school	Xi'an	20.4152	1.7	59	schizophrenia	rice	often	often	occasionally	often	often	never smoke or occasionally smoke	almost none	1.21	3.24	1.27	4.12	Paliperidone 3mg/d	6	8	90	22	15	53
S13	25	famale	famliy life	single	Undergraduate	Xi'an	19.1001	1.65	52	schizophrenia	rice	often	twice or three times a week	occasionally	occasionally	occasionally	never smoke or occasionally smoke	almost none	0.56	2.01	1.48	3.67	Risperidone 3mg/d	7	7	79	27	9	43
S14	24	male	famliy life	single	junior high school	Xi'an	19.4444	1.8	63	schizophrenia	flour	often	often	occasionally	occasionally	often	never smoke or occasionally smoke	almost none	0.89	3.12	1.31	4.60	Risperidone 2mg/d	9	11	83	25	21	37
S15	28	famale	famliy life	married	junior high school	Xi'an	27.1809	1.65	74	schizophrenia	rice,flour	often	twice or three times a week	twice or three times a week	occasionally	often	never smoke or occasionally smoke	less than 1 hour a day	1.10	3.31	1.26	4.04	Risperidone 2mg/d	11	9	98	29	17	52
S16	30	male	famliy life	single	junior college	Xi'an	24.9135	1.7	72	schizophrenia	flour	often	often	occasionally	occasionally	occasionally	never smoke or occasionally smoke	almost none	1.61	2.53	1.18	3.96	Risperidone 2mg/d	7	8	86	25	21	40
S17	32	famale	famliy life	married	Undergraduate	Xi'an	27.2173	1.66	75	schizophrenia	rice,flour	often	twice or three times a week	occasionally	occasionally	occasionally	never smoke or occasionally smoke	almost none	2.23	2.42	0.83	3.48	Risperidone 4mg/d	6	5	61	12	19	30
S18	19	male	group living	single	junior high school	Xi'an	15.8725	1.81	52	schizophrenia	rice,flour	often	often	often	occasionally	often	never smoke or occasionally smoke	almost none	1.39	2.67	1.78	4.16	Risperidone 4mg/d	3	5	60	16	10	34
S19	28	male	famliy life	single	high school	Xi'an	22.4913	1.7	65	schizophrenia	flour	often	often	twice or three times a week	occasionally	occasionally	intermittent smoking	almost none	0.96	3.07	1.36	4.47	Risperidone 3mg/d	7	6	54	16	12	26
S20	34	male	famliy life	single	junior college	Xi'an	26.6749	1.71	78	schizophrenia	flour	often	often	occasionally	occasionally	occasionally	never smoke or occasionally smoke	almost none	3.98	3.97	1.00	5.38	Risperidone 3mg/d	3	9	73	19	20	34
S21	27	male	famliy life	single	junior high school	Xi'an	21.0077	1.69	60	schizophrenia	rice,flour	often	often	twice or three times a week	occasionally	often	intermittent smoking	1 to 2 hours a day	2.48	1.95	1.39	4.46	Risperidone 4mg/d	4	6	64	24	12	42
S22	37	male	famliy life	single	junior high school	Xi'an	19.3625	1.67	54	schizophrenia	rice,flour	often	often	twice or three times a week	occasionally	often	intermittent smoking	1 to 2 hours a day	1.83	1.42	1.25	5.73	Risperidone 4mg/d	4	5	44	17	12	35
S23	33	famale	famliy life	married	primary school	Xi'an	24.4646	1.63	65	schizophrenia	rice,flour	often	twice or three times a week	twice or three times a week	occasionally	occasionally	never smoke or occasionally smoke	almost none	1.72	1.65	1.2	6.1	Risperidone 2mg/d	4	5	72	14	17	41
S24	41	famale	famliy life	single	junior college	Xi'an	19.0773	1.86	66	schizophrenia	flour	often	often	occasionally	occasionally	occasionally	never smoke or occasionally smoke	almost none	2.01	1.34	1.41	3.48	Risperidone 2mg/d	3	3	69	21	17	31
S25	45	famale	famliy life	married	junior high school	Xi'an	20.4152	1.7	59	schizophrenia	rice	often	often	occasionally	often	often	never smoke or occasionally smoke	almost none	2.00	3.17	1.12	4.20	Paliperidone 9mg/d	6	9	60	14	12	34
S26	25	famale	famliy life	single	Undergraduate	Xi'an	19.1001	1.65	52	schizophrenia	rice	often	twice or three times a week	occasionally	occasionally	occasionally	never smoke or occasionally smoke	almost none	0.56	2.01	1.48	3.67	Risperidone 6mg/d,Haloperidol injection 5mg	6	2	39	9	7	23
S27	24	male	famliy life	single	junior high school	Xi'an	19.4444	1.8	63	schizophrenia	flour	often	often	occasionally	occasionally	often	never smoke or occasionally smoke	almost none	0.75	2.25	1.69	3.98	Risperidone 4mg/d	3	3	71	21	14	36
S28	28	famale	famliy life	married	junior high school	Xi'an	27.1809	1.65	74	schizophrenia	rice,flour	often	twice or three times a week	twice or three times a week	occasionally	often	never smoke or occasionally smoke	less than 1 hour a day	2.21	3.66	1.20	5.08	Risperidone 6mg	8	5	83	25	12	46
S29	32	famale	famliy life	married	Undergraduate	Xi'an	27.2173	1.66	75	schizophrenia	rice,flour	often	twice or three times a week	occasionally	occasionally	occasionally	never smoke or occasionally smoke	almost none	2.6	2.62	0.91	3.93	Risperidone 4mg/d	2	3	38	7	12	19
S30	22	famale	group living	single	high school	Xi'an	24.1415	1.55	58	schizophrenia	flour	often	occasionally	occasionally	often	occasionally	never smoke or occasionally smoke	almost none	0.93	3.20	1.58	4.49	Risperidone 5mg/d, Olanzapine 20mg	5	6	88	17	20	51
S31	39	famale	group living	single	junior high school	Xi'an	15.8725	1.81	52	schizophrenia	rice,flour	often	often	often	occasionally	often	never smoke or occasionally smoke	almost none	2.23	2.08	1.37	3.29	Risperidone 4mg/d, Amisulpride 0.2g/d	6	8	46	9	9	28
ID	Age	Gender	Dwelling condition	Marital status	Education level	Sample center	BMI	Height (m)	Weight(kg)	Diagnosis	Staple food structure	Frequency of eating vegetables	Frequency of eating ivestock meat	Frequency of eating poultry	Frequency of eating nutrient supplements	Frequency of drinking yogurt or probiotic drinks	Smoking	In the past six months exposure to secondhand smoke situation	TG mmol/L	LDL mmol/L	HDL mmol/L	CHOL mmol/L	Drugs	HAMA	HAMD	PANSS	Positive	Negative	General
D001	23	famale	famliy life	married	junior high school	Xi'an	23.3844	1.68	66	Depression	flour	often	occasionally	occasionally	occasionally	occasionally	never smoke or occasionally smoke	less than 1 hour a day	1.12	2.68	1.34	4.14	Duloxetine 30mg	35	26	52	7	7	38
D002	37	famale	famliy life	married	technical secongdary school	Xi'an	20.5499	1.68	58	Depression	flour	often	twice or three times a week	twice or three times a week	occasionally	occasionally	never smoke or occasionally smoke	less than 1 hour a day	0.73	3.42	1.41	4.65	Venlafaxine 75mg	29	37	50	7	7	36
D003	36	male	famliy life	married	illiteracy	Xi'an	23.4375	1.6	60	Depression	flour	often	occasionally	occasionally	occasionally	occasionally	never smoke or occasionally smoke	almost none	1.95	3.44	1.17	4.75	Duloxetine 90mg	18	22	52	7	7	38
D004	34	famale	famliy life	married	technical secongdary school	Xi'an	22.4323	1.58	56	Depression	rice	often	twice or three times a week	twice or three times a week	occasionally	occasionally	never smoke or occasionally smoke	2-4 hour a day	1.04	4.64	1.53	5.63	Duloxetine 30mg	20	22	52	7	7	38
D005	36	famale	famliy life	married	technical secongdary school	Xi'an	18.6115	1.52	43	Depression	rice	often	twice or three times a week	occasionally	occasionally	occasionally	never smoke or occasionally smoke	less than 1 hour a day	0.85	2.09	1.09	3.64	Venlafaxine 75mg	35	26	51	7	9	35
D006	45	famale	famliy life	married	junior high school	Xi'an	20.4294	1.58	51	Depression	rice	often	often	occasionally	occasionally	occasionally	never smoke or occasionally smoke	less than 1 hour a day	1.04	4.64	1.53	5.63	Duloxetine	29	37	51	7	8	36
D007	34	famale	famliy life	married	primary school	Xi'an	22.3674	1.51	51	Depression	flour	often	often	occasionally	occasionally	occasionally	never smoke or occasionally smoke	less than 1 hour a day	0.73	2.17	1.17	3.55	Venlafaxine 75mg	27	29	65	7	13	45
D008	36	famale	famliy life	married	technical secongdary school	Xi'an	22.4766	1.55	54	Depression	flour	often	twice or three times a week	occasionally	occasionally	often	never smoke or occasionally smoke	almost none	0.66	2.69	1.07	3.48	Quetiapine 50mg，Lithium Carbonate 600mg	24	33	90	13	22	55
D009	48	male	famliy life	married	primary school	Xi'an	25.2174	1.63	67	Depression	rice	often	twice or three times a week	occasionally	occasionally	occasionally	never smoke or occasionally smoke	less than 1 hour a day	1.62	2.10	1.53	3.34	Venlafaxine 75mg	35	26	47	7	7	33
D010	45	famale	famliy life	married	illiteracy	Xi'an	24.7768	1.53	58	Depression	rice	often	twice or three times a week	occasionally	occasionally	often	never smoke or occasionally smoke	almost none	1.18	2.40	1.03	3.25	Venlafaxine 75mg	24	25	62	7	10	45
D011	51	famale	famliy life	married	junior high school	Xi'an	23.2335	1.58	58	Depression	flour	twice or three times a week	occasionally	occasionally	occasionally	occasionally	never smoke or occasionally smoke	almost none	1.89	3.68	1.18	4.47	Duloxetine 30mg	24	25	66	7	11	48
D012	44	male	famliy life	married	primary school	Xi'an	25.5937	1.63	68	Depression	rice	often	twice or three times a week	occasionally	occasionally	occasionally	never smoke or occasionally smoke	almost none	1.40	2.88	1.19	3.80	Venlafaxine 75mg	26	25	67	12	11	44
D013	28	famale	famliy life	married	junior high school	Xi'an	20.9572	1.62	55	Depression	rice,flour	twice or three times a week	twice or three times a week	twice or three times a week	twice or three times a week	occasionally	never smoke or occasionally smoke	almost none	1.89	1.85	1.48	2.96	Venlafaxine 75mg	22	21	67	7	14	46
D014	29	male	famliy life	married	junior high school	Xi'an	18.1787	1.52	42	Depression	rice,flour	twice or three times a week	twice or three times a week	twice or three times a week	twice or three times a week	occasionally	never smoke or occasionally smoke	almost none	1.29	2.37	1.32	3.37	Venlafaxine 225mg	10	9	57	7	12	38
D015	45	famale	famliy life	married	junior high school	Xi'an	21.4533	1.7	62	Depression	flour	often	twice or three times a week	occasionally	often	occasionally	never smoke or occasionally smoke	almost none	0.78	3.95	1.44	4.98	Duloxetine 30mg	23	25	71	7	14	50
D016	31	famale	famliy life	married	junior high school	Xi'an	24.7676	1.62	65	Depression	flour	often	twice or three times a week	occasionally	often	occasionally	never smoke or occasionally smoke	almost none	0.78	3.95	1.44	4.98	Duloxetine 90mg	11	10	60	7	12	41
D017	30	famale	famliy life	married	high school	Xi'an	22.5827	1.63	60	Depression	rice	occasionally	occasionally	occasionally	occasionally	occasionally	never smoke or occasionally smoke	almost none	0.51	2.35	1.56	3.71	Venlafaxine 75mg	22	25	65	7	13	45
D018	33	famale	famliy life	married	high school	Xi'an	21.4536	1.63	57	Depression	rice	occasionally	occasionally	occasionally	occasionally	occasionally	never smoke or occasionally smoke	almost none	0.72	3.13	1.52	4.39	Venlafaxine 225mg	6	7	50	7	11	32
D019	31	famale	famliy life	married	Undergraduate	Xi'an	18.7328	1.65	51	Depression	rice	often	often	twice or three times a week	occasionally	often	never smoke or occasionally smoke	almost none	0.70	2.04	1.24	4.00	Venlafaxine 75mg	20	24	51	7	9	35
D020	27	male	famliy life	married	junior college	Xi'an	22.9591	1.63	61	Depression	flour	often	twice or three times a week	twice or three times a week	twice or three times a week	twice or three times a week	never smoke or occasionally smoke	less than 1 hour a day	0.53	2.67	1.97	4.87	Duloxetine 30mg	20	24	42	7	8	27
D021	41	famale	famliy life	married	junior college	Xi'an	23.5078	1.65	64	Depression	flour	often	twice or three times a week	twice or three times a week	twice or three times a week	twice or three times a week	never smoke or occasionally smoke	less than 1 hour a day	0.63	1.59	1.38	3.15	Venlafaxine 75mg	16	15	49	7	7	35
D022	26	male	famliy life	married	junior high school	Xi'an	22.3214	1.68	63	Depression	rice	often	occasionally	occasionally	occasionally	occasionally	never smoke or occasionally smoke	almost none	1.23	2.77	1.73	4.65	Duloxetine 30mg	30	20	62	7	12	43
D023	27	famale	famliy life	married	technical secongdary school	Xi'an	26.2336	1.61	68	Depression	flour	often	occasionally	occasionally	often	occasionally	never smoke or occasionally smoke	almost none	1.33	4.44	1.46	6.36	Duloxetine 30mg	30	26	73	7	16	50
D024	36	famale	famliy life	married	high school	Xi'an	19.9219	1.6	51	Depression	flour	often	occasionally	twice or three times a week	often	occasionally	never smoke or occasionally smoke	almost none	0.90	3.07	2.08	5.76	Venlafaxine 75mg	29	27	80	7	16	57
D025	24	famale	famliy life	married	technical secongdary school	Xi'an	17.9687	1.6	46	Depression	rice	often	twice or three times a week	occasionally	twice or three times a week	occasionally	never smoke or occasionally smoke	almost none	1.18	3.43	1.4	4.73	Duloxetine 30mg	28	21	63	7	10	46
D026	25	male	group living	single	Undergraduate	Xi'an	15.2026	1.73	45.5	Depression	flour	often	occasionally	occasionally	often	occasionally	never smoke or occasionally smoke	almost none	0.55	2.69	1.38	3.95	Venlafaxine 75mg	32	23	74	10	13	51
D027	36	famale	famliy life	married	Undergraduate	Xi'an	20.7031	1.6	53	Depression	rice,flour	often	often	twice or three times a week	twice or three times a week	occasionally	never smoke or occasionally smoke	almost none	1.49	3.75	1.36	5.80	Bupropion 300mg, Mirtazapine 15mg	25	26	75	7	18	50
D028	34	male	famliy life	married	Undergraduate	Xi'an	19.8347	1.65	54	Depression	rice,flour	often	often	twice or three times a week	twice or three times a week	occasionally	never smoke or occasionally smoke	almost none	0.71	4.84	1.19	5.75	Bupropion 300mg, Quetiapine 300mg	11	10	54	7	11	36
D029	25	famale	famliy life	single	Undergraduate	Xi'an	16.4474	1.52	38	Depression	rice	often	occasionally	occasionally	occasionally	often	never smoke or occasionally smoke	over 4 hours a day	0.44	3.27	1.98	4.71	Venlafaxine 75mg	25	30	80	7	20	53
D030	35	male	famliy life	married	junior college	Xi'an	18.75	1.6	48	Depression	rice	often	occasionally	occasionally	often	often	never smoke or occasionally smoke	less than 1 hour a day	0.45	2.03	1.58	4.24	Venlafaxine 75mg, Quetiapine 50mg	24	21	61	7	10	44
D031	36	famale	famliy life	married	high school	Xi'an	21.3039	1.65	58	Depression	flour	often	twice or three times a week	occasionally	occasionally	often	never smoke or occasionally smoke	less than 1 hour a day	0.54	2.48	1.9	4.32	Venlafaxine 150mg, Quetiapine 200mg	29	28	45	7	7	31
D032	33	male	famliy life	married	high school	Xi'an	18.3655	1.65	50	Depression	flour	often	twice or three times a week	occasionally	occasionally	often	never smoke or occasionally smoke	less than 1 hour a day	0.82	1.71	1.16	3.39	Venlafaxine 150mg	15	15	37	7	7	23
D033	42	famale	famliy life	married	junior high school	Xi'an	17.9687	1.6	46	Depression	rice,flour	often	often	twice or three times a week	occasionally	often	never smoke or occasionally smoke	less than 1 hour a day	0.76	1.92	1.52	3.95	Duloxetine 90mg	29	26	68	7	15	46
D034	38	male	famliy life	married	junior high school	Xi'an	21.4844	1.6	55	Depression	rice,flour	often	often	twice or three times a week	occasionally	occasionally	never smoke or occasionally smoke	2-4 hour a day	1.37	2.09	0.99	3.75	Venlafaxine 75mg	29	27	63	7	14	42
D035	25	male	famliy life	married	high school	Xi'an	19.9481	1.63	53	Depression	flour	often	twice or three times a week	twice or three times a week	twice or three times a week	twice or three times a week	intermittent smoking	less than 1 hour a day	0.79	2.21	0.98	3.21	Venlafaxine 150mg	27	26	45	7	7	31
