# Supplementary material for: Alterations in Plasma Lipidomic Profiles in Adult Patients with Schizophrenia and Major Depressive Disorder
Source: Medicina (Kaunas). 2022 Oct 24;58(11):1509. doi: 10.3390/medicina58111509 (PMC9697358; doi:10.3390/medicina58111509)
Supplement: Supplementary file 1 [file medicina-58-01509-s001.zip › Supplementary Table S3-Differential lipid between each group.xlsx]

## Sheet: Sheet1
Supplementary Table S3-Differential lipid between each group
Comparison	Lipid Name	VIP	P.value	FDR	log2FC	SCZ	HC
SCZ vs. HC	CerP(d44:5)	1.55326	3.04e-13	5.56e-13	-6.54973	6.22e-05	0.005829
	DG(28:3e)	1.70367	1.25e-15	2.6e-15	7.80955	2	0.008915
	DG(34:3e)	1.53186	9.47e-41	4.37e-39	-5.9049	0.07018	4.205
	DGDG(47:12e)	1.63542	1.7e-31	1.82e-30	5.44239	0.04544	0.001045
	LPC(15:0)	1.62429	3.38e-23	1.29e-22	6.85194	0.4147	0.00359
	LPC(16:0)	1.61727	2.25e-28	1.63e-27	-6.90746	0.005961	0.7156
	LPC(18:1)	1.76395	1.22e-26	7.05e-26	-8.32403	0.0003679	0.1179
	LPC(20:2e)	2.1712	1.42e-31	1.54e-30	12.1654	0.3504	7.63e-05
	LPC(20:4)	1.51027	3.43e-26	1.88e-25	-6.06989	0.001569	0.1054
	LPC(24:0)	1.99271	1.68e-39	6.27e-38	10.3389	0.8934	0.0006898
	LPE(18:1e)	1.57027	1.43e-23	5.66e-23	6.35402	0.07519	0.0009192
	PC(12:0e/10:1)	1.87312	3e-23	1.15e-22	8.8897	0.0554	0.0001168
	PC(16:0/16:0)	1.68047	1.24e-41	6.95e-40	-7.17195	0.001009	0.1455
	PC(16:0/18:1)	1.50395	2.77e-40	1.21e-38	-5.92509	0.05041	3.063
	PC(16:0/20:3)	1.84467	1.51e-20	4.54e-20	-8.64272	0.001911	0.7638
	PC(16:0/20:4)	1.7018	2.24e-37	6.26e-36	-7.51632	0.01046	1.915
	PC(16:0/20:5)	1.53473	4.48e-18	1.1e-17	-6.44323	0.001425	0.124
	PC(16:0e/18:2)	1.57488	6.76e-32	7.69e-31	-6.22036	0.0013	0.09693
	PC(16:1/16:1)	1.55196	5.35e-24	2.18e-23	-6.16997	0.0003736	0.0269
	PC(16:1/18:1)	1.7534	4.08e-29	3.44e-28	-7.83529	0.02234	5.102
	PC(16:1/22:6)	1.95393	6.24e-30	5.68e-29	9.82589	3.349	0.00369
	PC(16:1e/16:0)	1.59703	2.27e-28	1.64e-27	-6.64006	0.0001522	0.01518
	PC(16:1e/18:2)	1.51015	1.4e-27	8.94e-27	-5.69036	0.00127	0.06558
	PC(16:1e/22:5)	1.52748	2.88e-18	7.21e-18	6.45535	0.5101	0.005813
	PC(16:2e/20:3)	1.51974	2.14e-14	4.22e-14	-6.08853	0.0001662	0.01131
	PC(17:0/18:1)	1.5394	3.58e-31	3.79e-30	-6.23387	0.0003897	0.02933
	PC(17:0/18:2)	1.63777	6.12e-31	6.31e-30	-6.815	0.0009361	0.1054
	PC(18:0/18:1)	1.81893	2.57e-37	6.96e-36	-8.53611	0.001195	0.4436
	PC(18:0/20:3)	1.86289	8.34e-26	4.19e-25	-9.09158	0.0009966	0.5437
	PC(18:0/20:4)	1.69247	2.7e-35	5.42e-34	-7.441	0.006221	1.081
	PC(18:0/20:5)	1.55923	5.36e-29	4.37e-28	-6.44116	0.005081	0.4415
	PC(18:0/22:4)	1.52036	2.49e-33	3.69e-32	5.96606	1.986	0.03177
	PC(18:0/22:6)	1.78812	9.81e-25	4.32e-24	-8.39521	0.0006986	0.2352
	PC(18:1/18:1)	1.50134	7.59e-45	1.19e-42	-5.83786	0.05315	3.04
	PC(18:1e/16:0)	1.72646	2.96e-27	1.83e-26	-7.54258	0.0003754	0.06999
	PC(18:2/18:2)	1.52431	1.4e-34	2.49e-33	-6.10627	0.0003774	0.026
	PC(18:3/18:2)	1.60676	1.93e-16	4.25e-16	-6.60275	0.0001851	0.01799
	PC(20:0/22:4)	1.65322	1.22e-29	1.06e-28	7.17546	0.09263	0.0006408
	PC(20:0e/22:5)	1.55156	4.23e-22	1.46e-21	6.45091	0.08281	0.0009466
	PC(20:1/18:1)	1.5195	4.16e-17	9.62e-17	-6.26527	0.0005602	0.04309
	PC(20:1e/12:0)	1.91499	5.29e-35	1.01e-33	9.63222	1.334	0.001681
	PC(20:5/18:2)	1.6249	2.33e-28	1.65e-27	-6.83886	0.0001831	0.02096
	PC(22:2/10:1)	1.59572	9.5e-14	1.79e-13	6.97054	0.04634	0.0003695
	PC(22:4/14:2)	1.62493	2.32e-28	1.65e-27	-6.92132	4.36e-05	0.005287
	PC(26:1/10:0)	1.58786	3.02e-28	2.08e-27	-6.65092	0.0008353	0.08394
	PC(30:1/20:4)	1.63559	4.62e-26	2.5e-25	7.21599	0.1176	0.000791
	PC(30:2)	1.94917	2.86e-23	1.11e-22	9.80808	0.078	8.7e-05
	PC(33:0e)	1.79884	3.73e-28	2.48e-27	8.47943	0.1004	0.0002813
	PC(36:0e)	1.72365	3.39e-21	1.07e-20	7.88523	0.04719	0.0001996
	PC(36:2e)	1.52068	1.98e-33	2.99e-32	-6.03344	0.001518	0.09943
	PC(38:2)	1.56315	1.96e-26	1.11e-25	-6.35682	0.0003309	0.02712
	PC(40:10)	1.64714	7.49e-24	3.03e-23	7.07648	0.01926	0.0001427
	PC(40:9)	1.50419	6.92e-43	5.42e-41	-5.87696	0.0009415	0.05533
	PC(42:1)	1.54801	3.1e-25	1.46e-24	6.1653	0.009409	0.0001311
	PC(42:2e)	1.74041	1.95e-20	5.82e-20	8.00375	0.2772	0.00108
	PC(42:5e)	1.876	7.48e-35	1.4e-33	9.15185	4.657	0.008187
	PC(44:4)	1.73751	3.21e-26	1.77e-25	7.95499	0.06794	0.0002738
	PC(44:4e)	1.57626	1.91e-17	4.55e-17	6.60699	0.1816	0.001863
	PC(44:5e)	1.88858	2.84e-29	2.42e-28	9.33452	1.257	0.001947
	PC(8:0e/9:0)	1.56859	2.4e-19	6.55e-19	6.61209	0.03099	0.0003168
	PC(8:1e/24:0)	1.73681	4.2e-21	1.32e-20	7.86333	0.5917	0.002541
	PE(16:1e/20:4)	1.62827	1.29e-21	4.17e-21	-6.74819	0.000372	0.03999
	PE(18:0/16:0)	1.69995	6.19e-18	1.5e-17	7.26147	0.0315	0.0002053
	PE(18:0/22:5)	1.6446	2.74e-37	7.16e-36	6.78827	0.7181	0.006497
	PE(20:2e/22:1)	1.65913	5.14e-14	9.88e-14	7.31641	0.09023	0.0005661
	PE(41:3)	1.7298	6.9e-24	2.8e-23	-5.1064	0.002342	0.08068
	PG(28:0/18:2)	1.51211	4.76e-25	2.16e-24	6.39934	0.575	0.006812
	PG(29:2e)	1.51472	6.42e-30	5.79e-29	-5.98249	0.0079	0.4995
	PI(18:0/18:2)	1.50812	7.97e-26	4.03e-25	-5.81142	0.01455	0.8171
	PI(18:0/20:4)	1.58541	2.8e-39	9.97e-38	-6.47033	0.02506	2.222
	PI(18:1/18:1)	1.61535	1.55e-19	4.3e-19	6.96469	0.3636	0.002911
	PI(18:3/20:3)	1.5592	1.76e-19	4.86e-19	6.53837	0.3546	0.003815
	SM(d14:0/22:5)	1.90724	1.58e-43	1.55e-41	-9.19987	0.008657	5.091
	SM(d31:1)	2.0965	3.21e-35	6.29e-34	11.5036	166.4	0.05731
	SM(d32:1)	1.54131	4.84e-27	2.94e-26	-6.20578	0.09573	7.066
	SM(d32:2)	1.75968	5.83e-50	2.28e-47	7.94242	166.9	0.6785
	SM(d33:2)	1.75064	8.28e-41	4.06e-39	7.99706	26.11	0.1022
	SM(d34:1)	1.61798	3.17e-73	2.48e-70	-6.80116	2.908	324.3
	SM(d34:2)	1.81407	2.03e-42	1.33e-40	-8.52885	0.07413	27.38
	SM(d40:2)	1.75145	3.42e-45	6.69e-43	-7.89835	0.1778	42.42
	SM(d43:5)	1.75813	6.38e-34	1.02e-32	-7.81483	0.01526	3.436
	SM(d44:5)	1.84517	1.06e-34	1.93e-33	-8.7476	0.06726	28.91
	SM(t32:1)	1.6131	8.96e-36	2.07e-34	6.90814	2.533	0.02109
	SM(t34:0)	1.51719	3.92e-33	5.59e-32	6.19962	16.14	0.2196
	ST(t16:0/20:2)	1.5593	6.13e-22	2.04e-21	-6.45294	0.00785	0.6877
	TG(12:0/20:4/20:5)	1.53288	1.34e-16	2.96e-16	6.32843	0.03826	0.0004761
	TG(15:0/14:0/18:2)	1.65991	1.11e-22	4.02e-22	6.83284	0.1238	0.001086
	TG(16:0/18:1/18:1)	1.84221	9.06e-43	6.46e-41	-8.68036	0.003571	1.465
	TG(16:0/18:2/18:2)	1.56533	4.26e-07	6.07e-07	-6.65954	0.0004301	0.04348
	TG(16:0e/16:0/18:1)	2.03983	3.65e-18	9.06e-18	11.023	2.316	0.001113
	TG(16:1/17:1/20:4)	1.7204	2.72e-24	1.14e-23	-3.59791	0.001461	0.01769
	TG(18:0/16:0/18:1)	1.61867	1.97e-25	9.54e-25	-7.0623	0.001165	0.1557
	TG(18:0/16:0/18:3)	1.68549	1.15e-37	3.46e-36	-7.24106	0.01447	2.189
	Cer(m32:0)	1.73924	1.69e-48	4.4e-46	-7.69315	0.0001755	0.03632
	TG(18:0/18:1/18:1)	1.6022	5.86e-33	8.12e-32	-6.55444	0.003278	0.3081
	TG(18:1/18:1/18:1)	1.86054	7.93e-29	6.16e-28	-8.6504	0.00143	0.5746
	TG(18:1/18:1/18:2)	1.51922	9.01e-34	1.41e-32	-5.66161	0.01696	0.8585
	TG(18:1/18:1/18:3)	2.10054	1.96e-36	4.96e-35	-11.2682	0.0003364	0.8297
	TG(18:1/18:1/22:5)	1.50228	4.04e-15	8.21e-15	6.00342	0.6582	0.01026
	TG(18:1/18:2/18:3)	1.58179	4.38e-27	2.69e-26	-6.28588	0.00537	0.419
	TG(20:1e/18:3/18:3)	1.74155	3.66e-13	6.66e-13	7.73662	0.04191	0.0001965
	TG(20:4e/12:2/12:2)	1.67596	3.06e-08	4.56e-08	7.11056	0.02587	0.0001872
	TG(24:1/18:2/18:2)	1.61279	4.45e-16	9.5e-16	7.09023	0.03739	0.0002744
Comparison	Lipid Name	VIP	P.value	FDR	log2FC	MDD	HC
MDD vs. HC	TG(18:3/18:2/18:3)	2.5244	0.001298	0.009603	1.35865	0.01502	0.005857
	PC(8:0e/6:0)	2.26852	5.87e-05	0.0009238	1.14843	0.0002015	9.09e-05
	CerG2GNAc1(d38:4)	2.53655	5.42e-09	7.08e-07	1.01354	0.001542	0.0007638
	PI(16:1)	3.13968	2.9e-09	5.68e-07	-1.43853	0.001561	0.004231
Comparison	Lipids Name	VIP	P.value	FDR	log2FC	MDD	SCZ
MDD vs. SCZ	CerP(d44:5)	1.58155	4.54e-12	8.32e-12	6.76925	0.006787	6.22e-05
	DG(20:4e)	1.66821	2.2e-40	1.72e-38	-6.75166	0.007461	0.8043
	DG(28:3e)	1.77635	9.62e-17	2.35e-16	-8.12986	0.007137	2
	LPC(15:0)	1.5782	1.07e-24	5.29e-24	-6.53016	0.004486	0.4147
	LPC(16:0)	1.67559	5.07e-37	1.59e-35	7.13508	0.8379	0.005961
	LPC(18:1)	1.84844	1.36e-31	1.72e-30	8.68769	0.1517	0.0003679
	LPC(20:2e)	2.14864	1.36e-33	2.32e-32	-12.0247	8.4e-05	0.3504
	LPC(20:4)	1.51995	1.73e-27	1.18e-26	6.05751	0.1045	0.001569
	LPC(24:0)	2.01147	6.17e-42	5.37e-40	-10.3429	0.0006915	0.8934
	PC(12:0e/10:1)	1.75711	8.8e-25	4.37e-24	-8.30586	0.0001749	0.0554
	PC(16:0/16:0)	1.69165	3.09e-42	3.03e-40	7.24352	0.1529	0.001009
	PC(16:0/18:1)	1.52951	9.89e-39	5.54e-37	6.04567	3.33	0.05041
	PC(16:0/20:3)	1.74233	3.76e-15	8.38e-15	8.28363	0.5955	0.001911
	PC(16:0/20:4)	1.70187	3.64e-38	1.68e-36	7.54319	1.951	0.01046
	PC(16:0/20:5)	1.61929	1.31e-24	6.33e-24	6.77166	0.1557	0.001425
	PC(16:1/16:1)	1.50724	7.64e-22	2.83e-21	6.16728	0.02685	0.0003736
	PC(16:1/18:1)	1.68651	2.2e-35	5.74e-34	7.5195	4.099	0.02234
	PC(16:1/22:6)	1.90884	7.48e-32	9.78e-31	-9.42973	0.00484	3.349
	PC(16:1e/16:0)	1.59763	1.79e-27	1.21e-26	6.69873	0.01581	0.0001522
	PC(16:1e/22:5)	1.64231	1.39e-19	4.21e-19	-6.85308	0.004413	0.5101
	PC(17:0/18:1)	1.58059	7.61e-13	1.47e-12	6.5733	0.03711	0.0003897
	PC(17:0/18:2)	1.60323	1.67e-19	4.98e-19	6.82591	0.1062	0.0009361
	PC(17:0/20:4)	1.52662	3.53e-09	5.72e-09	6.20478	0.03556	0.0004821
	PC(18:0/18:1)	1.83986	5.76e-26	3.27e-25	8.73167	0.508	0.001195
	PC(18:0/20:3)	1.92558	2.08e-26	1.24e-25	9.46823	0.7059	0.0009966
	PC(18:0/20:4)	1.72336	4.64e-30	4.6e-29	7.62142	1.225	0.006221
	PC(18:0/20:5)	1.60235	2.22e-38	1.16e-36	6.60879	0.4959	0.005081
	PC(18:0/22:6)	1.80595	5.65e-21	1.93e-20	8.52252	0.2569	0.0006986
	PC(18:0e/22:6)	1.55688	3.65e-33	5.84e-32	-5.96849	0.007572	0.4741
	PC(18:1/18:1)	1.50173	7.92e-36	2.3e-34	5.92219	3.223	0.05315
	PC(18:1e/16:0)	1.6441	4.26e-26	2.44e-25	7.23317	0.05648	0.0003754
	PC(18:2/18:2)	1.57891	4.07e-31	4.55e-30	6.373	0.03128	0.0003774
	PC(18:3/18:2)	1.54402	5.23e-21	1.81e-20	6.44976	0.01618	0.0001851
	PC(20:0/22:4)	1.65057	1.55e-31	1.89e-30	-7.03599	0.0007061	0.09263
	PC(20:0e/22:5)	1.57591	1.39e-23	6.28e-23	-6.41735	0.0009688	0.08281
	PC(20:1/18:1)	1.61015	2.75e-26	1.62e-25	6.67418	0.05721	0.0005602
	PC(20:1e/12:0)	1.93833	3.34e-37	1.14e-35	-9.59841	0.001715	1.334
	PC(20:1e/20:4)	1.52861	1.79e-36	5.41e-35	-5.86649	0.02336	1.363
	PC(20:1e/22:5)	1.54734	1.14e-22	4.64e-22	-6.09296	0.007859	0.5365
	PC(20:5/18:2)	1.64137	1.16e-28	9.68e-28	7.0002	0.02344	0.0001831
	PC(22:2/10:1)	1.64749	1e-14	2.17e-14	-7.00601	0.0003606	0.04634
	PC(22:4/14:2)	1.62927	1.19e-22	4.8e-22	7.07296	0.005873	4.36e-05
	PC(26:1/10:0)	1.62036	1.45e-28	1.18e-27	6.81345	0.09395	0.0008353
	PC(30:1/20:4)	1.73823	8.05e-28	5.74e-27	-7.66127	0.0005815	0.1176
	PC(30:2)	2.09606	7.68e-25	3.88e-24	-10.9372	3.94e-05	0.078
	PC(33:0e)	1.81373	5.52e-30	5.34e-29	-8.43972	0.0002895	0.1004
	PC(36:0e)	1.71051	1.28e-22	5.13e-22	-7.6878	0.0002289	0.04719
	PC(36:2e)	1.52882	4.82e-30	4.72e-29	6.12711	0.1061	0.001518
	PC(38:0e)	1.51947	6.21e-32	8.25e-31	-5.97937	0.0001457	0.009191
	PC(38:2)	1.555	9.79e-22	3.54e-21	6.50194	0.02999	0.0003309
	PC(38:9)	1.55078	2.09e-22	8.16e-22	-6.11879	0.0002172	0.01509
	PC(40:10)	1.56834	2.38e-25	1.3e-24	-6.45736	0.0002192	0.01926
	PC(40:9)	1.52756	2.82e-30	2.91e-29	6.01936	0.06107	0.0009415
	PC(42:2e)	1.75246	7.92e-22	2.92e-21	-8.00231	0.00108	0.2772
	PC(42:5e)	1.86588	4.88e-37	1.59e-35	-8.95143	0.009388	4.657
	Cer(d41:1+O)	1.51475	3.35e-22	1.28e-21	-5.36409	7.22e-05	0.002971
	PC(44:4)	1.73935	6.25e-28	4.66e-27	-7.77044	0.000311	0.06794
	PC(44:4e)	1.52549	1.34e-18	3.69e-18	-6.25429	0.002379	0.1816
	PC(44:5e)	1.87735	3.67e-31	4.26e-30	-9.11779	0.002257	1.257
	PC(8:0e/9:0)	1.54176	1.26e-20	4.14e-20	-6.33235	0.0003846	0.03099
	PC(8:1e/24:0)	1.68382	1.67e-22	6.61e-22	-7.45989	0.00336	0.5917
	PE(16:1e/20:4)	1.58914	2.43e-25	1.32e-24	6.66961	0.03787	0.000372
	PE(18:0/16:0)	1.54281	4.29e-19	1.22e-18	-6.57759	0.0003299	0.0315
	PE(18:0/22:5)	1.57568	1.45e-39	9.47e-38	-6.53282	0.007759	0.7181
	Cer(m17:0/22:2)	1.52954	8.41e-22	3.08e-21	-5.73543	4.94e-05	0.002633
	PE(20:2e/22:1)	1.60103	5.63e-15	1.24e-14	-6.96759	0.0007205	0.09023
	PE(41:3)	1.74485	2.41e-29	2.12e-28	5.13648	0.08238	0.002342
	PG(28:0/18:2)	1.71257	8.23e-27	5.04e-26	-7.07242	0.004271	0.575
	PG(29:2e)	1.54439	3.16e-45	6.2e-43	5.98335	0.4998	0.0079
	PI(16:0/18:1)	1.51569	3.79e-22	1.43e-21	5.99829	0.1756	0.002747
	PI(18:0/18:2)	1.51456	7.88e-26	4.44e-25	5.90424	0.8714	0.01455
	PI(18:0/20:4)	1.58265	1.07e-37	3.98e-36	6.5056	2.277	0.02506
	PI(18:1/18:1)	1.6187	7.34e-21	2.47e-20	-6.84975	0.003153	0.3636
	PI(18:3/20:3)	1.57661	8.32e-21	2.79e-20	-6.48165	0.003969	0.3546
	SM(d14:0/22:5)	1.8375	2.31e-33	3.85e-32	8.86984	4.05	0.008657
	SM(d18:2/23:3)	1.51386	5.05e-31	5.58e-30	-5.81441	0.1301	7.323
	SM(d31:1)	2.13126	1.97e-37	7.01e-36	-11.6554	0.05136	166.4
	Cer(m19:0/21:2)	1.51205	9.1e-38	3.57e-36	-5.60542	0.0008073	0.03931
	SM(d32:1)	1.56531	2.49e-38	1.22e-36	6.29868	7.536	0.09573
	SM(d32:2)	1.72522	6.54e-53	2.56e-50	-7.74236	0.7796	166.9
	SM(d33:2)	1.76863	2.6e-43	2.91e-41	-8.01718	0.1009	26.11
	SM(d34:1)	1.6286	1.4e-65	1.1e-62	6.82892	330.6	2.908
	SM(d34:2)	1.80302	6.66e-45	1.05e-42	8.44533	25.84	0.07413
	SM(d40:2)	1.73963	1.35e-39	9.47e-38	7.8681	41.54	0.1778
	SM(d43:5)	1.65751	1.72e-30	1.8e-29	7.36867	2.522	0.01526
	SM(d44:5)	1.81976	6.98e-29	5.89e-28	8.59455	26	0.06726
	SM(t32:1)	1.67715	4.75e-38	1.96e-36	-7.15637	0.01775	2.533
	SM(t34:0)	1.59264	2.94e-35	7.21e-34	-6.32539	0.2013	16.14
	ST(t16:0/20:2)	1.57386	3.96e-22	1.49e-21	6.44516	0.684	0.00785
	TG(12:0/18:2/18:2)	1.51587	5.3e-14	1.1e-13	-5.97937	0.011	0.6941
	TG(12:0/20:4/20:5)	1.54785	1.04e-17	2.67e-17	-6.09296	0.0005604	0.03826
	TG(15:0/14:0/18:2)	1.63473	3.51e-24	1.64e-23	-6.6167	0.001261	0.1238
	TG(16:0/16:0/18:1)	1.54295	1.88e-20	6.04e-20	5.77986	0.4902	0.008922
	TG(16:0/18:1/18:1)	1.83167	9.27e-36	2.51e-34	8.67444	1.459	0.003571
	TG(16:0/18:2/18:2)	1.60188	4.37e-09	7.04e-09	6.74301	0.04607	0.0004301
	TG(16:0e/16:0/18:1)	2.07514	2.03e-19	6.01e-19	-11.0861	0.001062	2.316
	TG(16:1/17:1/20:4)	1.70743	1.74e-14	3.71e-14	3.65311	0.01838	0.001461
	TG(16:1/18:1/18:2)	1.52442	3.28e-22	1.26e-21	6.02128	1.792	0.02759
	TG(18:0/16:0/18:1)	1.69059	2.88e-18	7.69e-18	7.45351	0.2042	0.001165
	TG(18:0/16:0/18:3)	1.66941	3.8e-32	5.23e-31	7.22516	2.165	0.01447
	Cer(m32:0)	1.72349	1.54e-34	3.45e-33	7.7238	0.0371	0.0001755
	TG(18:0/18:1/18:1)	1.64215	4.3e-33	6.62e-32	6.79458	0.3639	0.003278
	TG(18:1/18:1/18:1)	1.85245	4.63e-16	1.08e-15	8.80388	0.6391	0.00143
	TG(18:1/18:1/18:3)	2.14018	3.89e-12	7.17e-12	11.7702	1.175	0.0003364
	TG(18:1/18:2/18:3)	1.68091	1.42e-08	2.22e-08	7.14075	0.7578	0.00537
	TG(18:3/18:2/18:2)	1.54655	8.22e-08	1.24e-07	6.58018	0.2482	0.002594
	Cer(m38:2+O)	1.67993	8.74e-25	4.36e-24	-6.75789	5.36e-05	0.005801
	TG(20:1e/18:3/18:3)	1.62822	4.55e-14	9.54e-14	-7.28997	0.000268	0.04191
	TG(20:4e/12:2/12:2)	1.52621	8.83e-09	1.4e-08	-6.47265	0.0002913	0.02587
	TG(24:1/18:2/18:2)	1.64361	3.68e-17	9.18e-17	-6.75633	0.000346	0.03739
	Cer(t18:1/22:0)	1.53603	5.98e-22	2.22e-21	-5.71028	2.37e-05	0.00124
