# Supplementary material for: Alterations in Plasma Lipidomic Profiles in Adult Patients with Schizophrenia and Major Depressive Disorder
Source: Medicina (Kaunas). 2022 Oct 24;58(11):1509. doi: 10.3390/medicina58111509 (PMC9697358; doi:10.3390/medicina58111509)
Supplement: Supplementary file 1 [file medicina-58-01509-s001.zip › Supplementary Table S4. Correlation between clinical symptoms and levels of differential lipids in the plasma.xlsx]

## Sheet: Sheet1
Supplementary Table S4. Correlation between clinical symptoms and levels of differential lipids in the plasma (r value)
Comparison	lipid	HAMA	HAMD	PANSS	Positive	Negative	General
MDD vs. HC	CerG2GNAc1(d38:4)	0.566367	0.529335	0.525416	-0.0951639	0.367207	0.555757
	PC(8:0e/6:0)	0.50458	0.459662	0.437096	-0.0137621	0.280481	0.462028
	PI(16:1)	-0.558382	-0.565164	-0.60602	-0.0575252	-0.414214	-0.625262
MDD vs. SCZ	Cer(d41:1+O)	-0.741561	-0.735266	0.333008	0.797432	0.353813	-0.149974
	Cer(m17:0/22:2)	-0.746089	-0.746532	0.256913	0.714758	0.369301	-0.223712
	Cer(m19:0/21:2)	-0.822885	-0.811968	0.363831	0.84243	0.392526	-0.156921
	Cer(m32:0)	0.827068	0.791187	-0.389231	-0.804177	-0.414938	0.111618
	Cer(m38:2+O)	-0.774199	-0.748499	0.307367	0.726145	0.408444	-0.189671
	Cer(t18:1/22:0)	-0.745092	-0.713503	0.294714	0.687978	0.428768	-0.20256
	CerP(d44:5)	0.639332	0.629731	-0.178768	-0.614373	-0.181902	0.230082
	DG(20:4e)	-0.826935	-0.830772	0.400121	0.81477	0.421249	-0.104657
	DG(28:3e)	-0.696596	-0.70187	0.25358	0.597871	0.423847	-0.198528
	LPC(15:0)	-0.786354	-0.779272	0.252882	0.690059	0.328028	-0.218085
	LPC(16:0)	0.80783	0.76442	-0.409935	-0.800146	-0.434595	0.0804129
	LPC(18:1)	0.790087	0.742631	-0.385311	-0.776388	-0.429247	0.104222
	LPC(20:2e)	-0.813118	-0.800034	0.395837	0.772468	0.438322	-0.0872396
	LPC(20:4)	0.77333	0.732662	-0.402419	-0.76415	-0.43089	0.0647752
	LPC(24:0)	-0.825329	-0.817202	0.413579	0.804462	0.455917	-0.0995499
	PC(12:0e/10:1)	-0.750502	-0.71919	0.400262	0.833396	0.383798	-0.113565
	PC(16:0/16:0)	0.81677	0.799424	-0.39887	-0.81536	-0.435898	0.112869
	PC(16:0/18:1)	0.807901	0.791802	-0.396594	-0.808814	-0.434258	0.111388
	PC(16:0/20:3)	0.587995	0.568191	-0.29779	-0.66626	-0.319524	0.124542
	PC(16:0/20:4)	0.818288	0.793527	-0.373117	-0.805867	-0.408797	0.138555
	PC(16:0/20:5)	0.809676	0.785286	-0.331621	-0.756856	-0.374282	0.159936
	PC(16:1/16:1)	0.685368	0.651262	-0.361455	-0.737799	-0.377856	0.0929648
	PC(16:1/18:1)	0.822004	0.802118	-0.387903	-0.803064	-0.430189	0.121065
	PC(16:1/22:6)	-0.826383	-0.813868	0.327349	0.786057	0.342156	-0.151645
	PC(16:1e/16:0)	0.752211	0.747948	-0.359371	-0.771879	-0.389491	0.128363
	PC(16:1e/22:5)	-0.741637	-0.746152	0.276175	0.720807	0.230092	-0.120879
	PC(17:0/18:1)	0.65104	0.600504	-0.242561	-0.597076	-0.31814	0.171668
	PC(17:0/18:2)	0.733407	0.672564	-0.315606	-0.710512	-0.373771	0.154071
	PC(17:0/20:4)	0.575968	0.512291	-0.237688	-0.538764	-0.303582	0.130419
	PC(18:0/18:1)	0.775236	0.755564	-0.305223	-0.753724	-0.341053	0.187146
	PC(18:0/20:3)	0.752325	0.722865	-0.336304	-0.76025	-0.355892	0.14308
	PC(18:0/20:4)	0.76943	0.741301	-0.37225	-0.778757	-0.399865	0.114755
	PC(18:0/20:5)	0.804391	0.793427	-0.378433	-0.808035	-0.404815	0.128335
	PC(18:0/22:6)	0.71786	0.71143	-0.346246	-0.729868	-0.359075	0.104356
	PC(18:0e/22:6)	-0.813882	-0.801475	0.340323	0.802194	0.362764	-0.158541
	PC(18:1/18:1)	0.807642	0.785088	-0.390768	-0.807175	-0.417667	0.11258
	PC(18:1e/16:0)	0.737016	0.714205	-0.334801	-0.766355	-0.357086	0.151986
	PC(18:2/18:2)	0.812635	0.792918	-0.411603	-0.787942	-0.457939	0.0811891
	PC(18:3/18:2)	0.821966	0.776229	-0.284878	-0.724879	-0.323905	0.193912
	PC(20:0/22:4)	-0.797917	-0.805272	0.31931	0.7941	0.353544	-0.169835
	PC(20:0e/22:5)	-0.777738	-0.768071	0.253764	0.731055	0.295462	-0.152724
	PC(20:1/18:1)	0.763787	0.744712	-0.361485	-0.751555	-0.383001	0.104628
	PC(20:1e/12:0)	-0.821624	-0.811905	0.348212	0.830091	0.376926	-0.170686
	PC(20:1e/20:4)	-0.815319	-0.801515	0.331658	0.793422	0.386539	-0.190168
	PC(20:1e/22:5)	-0.754861	-0.736003	0.344538	0.727415	0.400929	-0.117441
	PC(20:5/18:2)	0.803749	0.793728	-0.354856	-0.770781	-0.400779	0.14152
	PC(22:2/10:1)	-0.693954	-0.69731	0.195285	0.638465	0.194881	-0.158819
	PC(22:4/14:2)	0.74467	0.697633	-0.335602	-0.742752	-0.351621	0.129652
	PC(26:1/10:0)	0.778616	0.752244	-0.34792	-0.769414	-0.37238	0.137143
	PC(30:1/20:4)	-0.784842	-0.76845	0.356456	0.828125	0.369106	-0.13652
	PC(30:2)	-0.80108	-0.784269	0.255069	0.71559	0.298161	-0.186168
	PC(33:0e)	-0.793173	-0.782872	0.368065	0.838901	0.397194	-0.148903
	PC(36:0e)	-0.767824	-0.758224	0.268912	0.729653	0.327214	-0.18388
	PC(36:2e)	0.787418	0.738693	-0.389099	-0.787266	-0.419819	0.102346
	PC(38:0e)	-0.82243	-0.806993	0.290202	0.762766	0.332694	-0.193337
	PC(38:2)	0.703665	0.694698	-0.347053	-0.734355	-0.347103	0.100013
	PC(38:9)	-0.76871	-0.756436	0.303375	0.675625	0.353815	-0.122559
	PC(40:10)	-0.794617	-0.796252	0.227461	0.717701	0.268024	-0.21554
	PC(40:9)	0.790771	0.755438	-0.378936	-0.784661	-0.403114	0.108974
	PC(42:2e)	-0.758399	-0.759846	0.303608	0.760361	0.288463	-0.126134
	PC(42:5e)	-0.816653	-0.799181	0.37655	0.827638	0.399607	-0.140515
	PC(44:4)	-0.789714	-0.794888	0.341598	0.805808	0.322233	-0.122147
	PC(44:4e)	-0.739947	-0.740043	0.202034	0.669694	0.219133	-0.190402
	PC(44:5e)	-0.800623	-0.797341	0.331477	0.77398	0.369882	-0.152818
	PC(8:0e/9:0)	-0.75946	-0.767557	0.269817	0.681512	0.298491	-0.124415
	PC(8:1e/24:0)	-0.758559	-0.755689	0.363236	0.755233	0.406804	-0.0912626
	PE(16:1e/20:4)	0.76448	0.747011	-0.370135	-0.766155	-0.395177	0.107874
	PE(18:0/16:0)	-0.720762	-0.700043	0.376706	0.705367	0.419312	-0.0947107
	PE(18:0/22:5)	-0.83379	-0.818468	0.385878	0.839498	0.413175	-0.133821
	PE(20:2e/22:1)	-0.696753	-0.70608	0.211258	0.617199	0.240046	-0.123831
	PE(41:3)	0.811949	0.834669	-0.380748	-0.755115	-0.449776	0.104367
	PG(28:0/18:2)	-0.765812	-0.746919	0.375041	0.804672	0.431732	-0.142379
	PG(29:2e)	0.819911	0.825242	-0.412929	-0.814955	-0.46435	0.100835
	PI(16:0/18:1)	0.756499	0.738245	-0.303301	-0.724964	-0.336914	0.168179
	PI(18:0/18:2)	0.76629	0.743753	-0.313074	-0.760622	-0.334788	0.175478
	PI(18:0/20:4)	0.791999	0.80162	-0.402847	-0.807932	-0.421614	0.0926473
	PI(18:1/18:1)	-0.745832	-0.766418	0.299204	0.721613	0.285738	-0.110786
	PI(18:3/20:3)	-0.742225	-0.760133	0.27959	0.710761	0.279078	-0.14484
	SM(d14:0/22:5)	0.803981	0.794712	-0.344999	-0.791274	-0.388073	0.167977
	SM(d18:2/23:3)	-0.8025	-0.803596	0.305088	0.710746	0.337291	-0.132394
	SM(d31:1)	-0.82732	-0.805623	0.394554	0.83952	0.421234	-0.137801
	SM(d32:1)	0.817697	0.801671	-0.379713	-0.806005	-0.416286	0.130677
	SM(d32:2)	-0.838595	-0.824421	0.376722	0.809994	0.406952	-0.135432
	SM(d33:2)	-0.824888	-0.803119	0.394348	0.795983	0.444174	-0.101586
	SM(d34:1)	0.843699	0.827765	-0.400757	-0.8323	-0.443313	0.125899
	SM(d34:2)	0.820277	0.785422	-0.399847	-0.824996	-0.426128	0.113435
	SM(d40:2)	0.803168	0.791279	-0.371471	-0.814876	-0.402765	0.145411
	SM(d43:5)	0.827358	0.838862	-0.351562	-0.781968	-0.394873	0.152633
	SM(d44:5)	0.83502	0.822771	-0.363409	-0.771968	-0.418785	0.136099
	SM(t32:1)	-0.832806	-0.80782	0.365679	0.823644	0.388297	-0.152612
	SM(t34:0)	-0.823968	-0.802459	0.398882	0.829946	0.419692	-0.117019
	ST(t16:0/20:2)	0.745702	0.774773	-0.386479	-0.723542	-0.403596	0.0483823
	TG(12:0/18:2/18:2)	-0.66347	-0.68328	0.265788	0.653011	0.285279	-0.108376
	TG(12:0/20:4/20:5)	-0.689392	-0.699314	0.269783	0.653362	0.365956	-0.143795
	TG(15:0/14:0/18:2)	-0.745848	-0.754593	0.351008	0.787466	0.367396	-0.127272
	TG(16:0/16:0/18:1)	0.767498	0.728821	-0.327972	-0.728887	-0.347556	0.132122
	TG(16:0/18:1/18:1)	0.838862	0.818112	-0.41981	-0.802493	-0.451217	0.0731309
	TG(16:0/18:2/18:2)	0.609048	0.560244	-0.245388	-0.552903	-0.238408	0.0935552
	TG(16:0e/16:0/18:1)	-0.731984	-0.732036	0.213939	0.610531	0.392071	-0.249897
	TG(16:1/17:1/20:4)	0.716515	0.660044	-0.315607	-0.639441	-0.376398	0.0944552
	TG(16:1/18:1/18:2)	0.822563	0.764917	-0.326871	-0.743092	-0.333441	0.136788
	TG(18:0/16:0/18:1)	0.74996	0.716539	-0.28418	-0.701844	-0.30269	0.167071
	TG(18:0/16:0/18:3)	0.843534	0.812067	-0.377485	-0.792187	-0.397173	0.114663
	TG(18:0/18:1/18:1)	0.844913	0.792878	-0.387058	-0.79596	-0.412016	0.109621
	TG(18:1/18:1/18:1)	0.767216	0.706973	-0.266072	-0.675068	-0.266978	0.160868
	TG(18:1/18:1/18:3)	0.746473	0.660195	-0.213665	-0.614571	-0.223479	0.188554
	TG(18:1/18:2/18:3)	0.676482	0.573874	-0.175922	-0.538381	-0.185596	0.181032
	TG(18:3/18:2/18:2)	0.672116	0.572074	-0.142765	-0.512625	-0.148016	0.20243
	TG(20:1e/18:3/18:3)	-0.66639	-0.643071	0.274098	0.644839	0.383822	-0.117734
	TG(20:4e/12:2/12:2)	-0.548831	-0.562947	0.114677	0.425502	0.312783	-0.207578
	TG(24:1/18:2/18:2)	-0.693352	-0.701678	0.275263	0.633099	0.422435	-0.154053
SCZ vs. HC	Cer(m32:0)	-0.302128	-0.605063	-0.81024	-0.808566	-0.726623	-0.792147
	CerP(d44:5)	-0.230817	-0.527375	-0.62771	-0.629655	-0.57675	-0.606061
	DG(28:3e)	0.219476	0.40665	0.615528	0.576088	0.665955	0.583517
	DG(34:3e)	-0.313978	-0.612779	-0.79626	-0.795338	-0.716097	-0.77689
	DGDG(47:12e)	0.237301	0.547751	0.804459	0.795547	0.740145	0.776082
	LPC(15:0)	0.173099	0.441267	0.662019	0.67056	0.600208	0.647997
	LPC(16:0)	-0.260333	-0.586146	-0.771003	-0.766612	-0.697644	-0.752384
	LPC(18:1)	-0.232561	-0.560167	-0.76316	-0.764452	-0.686724	-0.743229
	LPC(20:2e)	0.250535	0.53698	0.796635	0.755842	0.724853	0.796265
	LPC(20:4)	-0.239761	-0.55267	-0.762442	-0.765826	-0.689635	-0.739679
	LPC(24:0)	0.291707	0.560603	0.823288	0.789067	0.750231	0.809001
	LPE(18:1e)	0.171779	0.461066	0.641023	0.686708	0.579225	0.655532
	PC(12:0e/10:1)	0.327884	0.645896	0.773361	0.822518	0.65516	0.730518
	PC(16:0/16:0)	-0.293257	-0.607634	-0.802857	-0.800342	-0.727242	-0.782506
	PC(16:0/18:1)	-0.301045	-0.606735	-0.800602	-0.796938	-0.727234	-0.780039
	PC(16:0/20:3)	-0.307995	-0.526051	-0.709195	-0.707026	-0.639688	-0.692828
	PC(16:0/20:4)	-0.305096	-0.597881	-0.796232	-0.796004	-0.72409	-0.773221
	PC(16:0/20:5)	-0.306823	-0.493196	-0.684344	-0.681504	-0.628154	-0.664199
	PC(16:0e/18:2)	-0.306223	-0.566701	-0.781682	-0.78414	-0.6979	-0.76279
	PC(16:1/16:1)	-0.256031	-0.611447	-0.740991	-0.745514	-0.668176	-0.719071
	PC(16:1/18:1)	-0.250944	-0.607662	-0.761787	-0.763476	-0.687964	-0.74128
	PC(16:1/22:6)	0.165356	0.465104	0.740933	0.770623	0.627631	0.738993
	PC(16:1e/16:0)	-0.302976	-0.579617	-0.766896	-0.766984	-0.693994	-0.745903
	PC(16:1e/18:2)	-0.323996	-0.550494	-0.772816	-0.771575	-0.697135	-0.752428
	PC(16:1e/22:5)	0.175163	0.386453	0.652103	0.704342	0.48681	0.678231
	PC(16:2e/20:3)	-0.211881	-0.448083	-0.64959	-0.662586	-0.580183	-0.627209
	PC(17:0/18:1)	-0.283607	-0.585178	-0.782073	-0.774976	-0.709105	-0.76409
	PC(17:0/18:2)	-0.296297	-0.585559	-0.788442	-0.781672	-0.71206	-0.77108
	PC(18:0/18:1)	-0.289459	-0.602584	-0.795241	-0.7917	-0.716275	-0.777425
	PC(18:0/20:3)	-0.285264	-0.554753	-0.751484	-0.742966	-0.691494	-0.731649
	PC(18:0/20:4)	-0.288295	-0.578032	-0.792275	-0.790039	-0.719748	-0.770937
	PC(18:0/20:5)	-0.316271	-0.565652	-0.764718	-0.768611	-0.699766	-0.738563
	PC(18:0/22:4)	0.210345	0.502607	0.729904	0.760406	0.645662	0.7149
	PC(18:0/22:6)	-0.295432	-0.55918	-0.748843	-0.741518	-0.685005	-0.729854
	PC(18:1/18:1)	-0.290867	-0.604613	-0.812547	-0.806111	-0.735859	-0.793734
	PC(18:1e/16:0)	-0.274749	-0.569087	-0.761741	-0.764654	-0.683497	-0.741785
	PC(18:2/18:2)	-0.286657	-0.566955	-0.799088	-0.790762	-0.712473	-0.786445
	PC(18:3/18:2)	-0.257656	-0.462211	-0.693279	-0.694279	-0.62537	-0.674037
	PC(20:0/22:4)	0.28208	0.490781	0.734012	0.779375	0.637968	0.72336
	PC(20:0e/22:5)	0.172392	0.446161	0.657288	0.714218	0.564414	0.690418
	PC(20:1/18:1)	-0.297077	-0.513102	-0.678738	-0.660842	-0.629532	-0.664693
	PC(20:1e/12:0)	0.261671	0.538486	0.76737	0.816801	0.668387	0.742139
	PC(20:5/18:2)	-0.295056	-0.602167	-0.766171	-0.756521	-0.692992	-0.751245
	PC(22:2/10:1)	0.102475	0.309421	0.554162	0.621113	0.430679	0.584327
	PC(22:4/14:2)	-0.268108	-0.602281	-0.781253	-0.768011	-0.714576	-0.763984
	PC(26:1/10:0)	-0.288003	-0.60644	-0.764819	-0.761135	-0.70358	-0.741804
	PC(30:1/20:4)	0.262472	0.548587	0.751253	0.815989	0.647022	0.731306
	PC(30:2)	0.114167	0.425333	0.663895	0.697294	0.570682	0.673748
	PC(33:0e)	0.273684	0.540814	0.766694	0.827176	0.678725	0.732787
	PC(36:0e)	0.184274	0.451175	0.664379	0.71312	0.593292	0.658503
	PC(36:2e)	-0.277986	-0.581212	-0.794197	-0.790581	-0.722044	-0.772332
	PC(38:2)	-0.292958	-0.583587	-0.757945	-0.756618	-0.693781	-0.734464
	PC(40:10)	0.15365	0.397567	0.645574	0.699986	0.542559	0.654497
	PC(40:9)	-0.3229	-0.612486	-0.805223	-0.797648	-0.727925	-0.788423
	PC(42:1)	0.26127	0.537947	0.725239	0.797505	0.629026	0.700254
	PC(42:2e)	0.19559	0.420035	0.686509	0.746008	0.552867	0.696872
	PC(42:5e)	0.280925	0.58029	0.788512	0.814228	0.690518	0.765375
	PC(44:4)	0.2444	0.461591	0.740472	0.792521	0.601017	0.743132
	PC(44:4e)	0.135486	0.366823	0.591746	0.652146	0.474254	0.614597
	PC(44:5e)	0.263675	0.510902	0.742394	0.757891	0.653998	0.735237
	PC(8:0e/9:0)	0.141181	0.352302	0.65433	0.66306	0.558562	0.686607
	PC(8:1e/24:0)	0.219005	0.456032	0.735216	0.740479	0.671637	0.7304
	PE(16:1e/20:4)	-0.288648	-0.577452	-0.724842	-0.729142	-0.658193	-0.701526
	PE(18:0/16:0)	0.238647	0.520701	0.7253	0.689657	0.67125	0.693637
	PE(18:0/22:5)	0.235101	0.537573	0.798935	0.826594	0.705251	0.776663
	PE(20:2e/22:1)	0.107267	0.295608	0.569094	0.59889	0.477041	0.61612
	PE(41:3)	-0.2536	-0.533127	-0.744822	-0.719173	-0.707676	-0.72764
	PG(28:0/18:2)	0.31937	0.602111	0.761129	0.790972	0.70607	0.7199
	PG(29:2e)	-0.302879	-0.596287	-0.767902	-0.761865	-0.700055	-0.749685
	PI(18:0/18:2)	-0.317238	-0.596827	-0.756009	-0.753489	-0.694311	-0.732275
	PI(18:0/20:4)	-0.286133	-0.60267	-0.810907	-0.800011	-0.736204	-0.793751
	PI(18:1/18:1)	0.210057	0.364437	0.677557	0.705329	0.546638	0.699329
	PI(18:3/20:3)	0.220951	0.383292	0.662317	0.693655	0.53982	0.672001
	SM(d14:0/22:5)	-0.306288	-0.584118	-0.809393	-0.806188	-0.721728	-0.793946
	SM(d31:1)	0.239979	0.562123	0.802767	0.826817	0.712305	0.768589
	SM(d32:1)	-0.26916	-0.564444	-0.742789	-0.743728	-0.674823	-0.721866
	SM(d32:2)	0.295636	0.589325	0.803943	0.794348	0.706926	0.795341
	SM(d33:2)	0.303784	0.618509	0.810253	0.779924	0.73959	0.809945
	SM(d34:1)	-0.272242	-0.601603	-0.82205	-0.819817	-0.73592	-0.804805
	SM(d34:2)	-0.307648	-0.582292	-0.801586	-0.806219	-0.717501	-0.780755
	SM(d40:2)	-0.254484	-0.572414	-0.809804	-0.804004	-0.726531	-0.794093
	SM(d43:5)	-0.349315	-0.558523	-0.789753	-0.787145	-0.702048	-0.775354
	SM(d44:5)	-0.335284	-0.587285	-0.792772	-0.788259	-0.705698	-0.778987
	SM(t32:1)	0.223138	0.560748	0.781809	0.809748	0.680264	0.758517
	SM(t34:0)	0.227822	0.552207	0.801899	0.816917	0.707936	0.778031
	ST(t16:0/20:2)	-0.347239	-0.533408	-0.735793	-0.724716	-0.659625	-0.725068
	TG(12:0/20:4/20:5)	0.295402	0.459069	0.636193	0.635394	0.613454	0.640353
	TG(15:0/14:0/18:2)	0.321639	0.504917	0.734401	0.775305	0.637611	0.715899
	TG(16:0/18:1/18:1)	-0.300369	-0.602772	-0.803334	-0.805808	-0.719123	-0.783643
	TG(16:0/18:2/18:2)	-0.149335	-0.348149	-0.490007	-0.508861	-0.423881	-0.472659
	TG(16:0e/16:0/18:1)	0.207698	0.426397	0.60492	0.588009	0.646208	0.576115
	TG(16:1/17:1/20:4)	-0.293871	-0.594236	-0.712136	-0.718054	-0.647236	-0.696565
	TG(18:0/16:0/18:1)	-0.286335	-0.610333	-0.738853	-0.742721	-0.666084	-0.718279
	TG(18:0/16:0/18:3)	-0.327279	-0.617049	-0.800357	-0.79732	-0.719576	-0.781942
	TG(18:0/18:1/18:1)	-0.285579	-0.60633	-0.784654	-0.781423	-0.70988	-0.763387
	TG(18:1/18:1/18:1)	-0.298059	-0.610342	-0.764127	-0.756587	-0.699115	-0.744997
	TG(18:1/18:1/18:2)	-0.298275	-0.564758	-0.790173	-0.790742	-0.709077	-0.769321
	TG(18:1/18:1/18:3)	-0.334618	-0.602905	-0.795901	-0.787845	-0.716609	-0.780737
	TG(18:1/18:1/22:5)	0.196632	0.340002	0.586467	0.621146	0.552027	0.585294
	TG(18:1/18:2/18:3)	-0.329361	-0.598791	-0.773056	-0.758719	-0.702684	-0.758586
	TG(20:1e/18:3/18:3)	0.172726	0.452554	0.60734	0.628808	0.612218	0.605825
	TG(20:4e/12:2/12:2)	0.152627	0.270708	0.417226	0.405315	0.500045	0.414045
	TG(24:1/18:2/18:2)	0.248294	0.427194	0.635929	0.613817	0.667413	0.624639
